# Supplementary material
Source: Research Square preprint supplement (doi:10.21203/rs.3.rs-10094220/v1)
Supplement: Supplementary file 1 [file 5cbc3bec788acd322347af47.docx]

Table 1 – Sample Distribution based on Demographic Data

| Group | Number of Samples (%) | Male (%) | Female (%) | Mean Age (±SD) |
| --- | --- | --- | --- | --- |
| ALL | 1,727 (81.8%) | 906 (52.5%) | 821 (47.4%) | 9.96 ± 3.78 |
| AML | 175 (8.2%) | 92 (52.6%) | 83 (47.4%) | 4.60 ± 4.76 |
| NHL | 207 (9.8%) | 144 (69.6%) | 63 (30.4%) | 7.51 ± 3.56 |

ALL indicates Acute Lymphoblastic Leukemia; AML indicates Acute Myeloid Leukemia; NHL indicates Non-Hodgkin Lymphoma.

\

Table 2 – Comparison of Results Based on Method and Disease Type

| Group | Cytocentrifuge | | | Totall |
| --- | --- | --- | --- | --- |
| (Negative) | (Suspicious) | (Positive) |
| ALL | 1,681 | 24 | 22 | 1727 |
| AML | 171 | 3 | 1 | 175 |
| NHL | 197 | 3 | 7 | 207 |
| Totall | 2049 | 30 | 30 | 2109 |

| Group | Neubauer | | | Totall |
| --- | --- | --- | --- | --- |
| (Negative) | (Suspicious) | (Positive) |
| ALL | 1,721 | 0 | 6 | 1727 |
| AML | 175 | 0 | 0 | 175 |
| NHL | 207 | 0 | 0 | 207 |
| Totall | 2103 | 0 | 6 | 2109 |

ALL indicates Acute Lymphoblastic Leukemia; AML indicates Acute Myeloid Leukemia; NHL indicates Non-Hodgkin Lymphoma.

Table 3 – Cross-Tabulation Between Cytocentrifuge and Neubauer Methods

| Neubauer  Cytocentrifuge | Negative | Suspicious | Positive | Total |
| --- | --- | --- | --- | --- |
| Negative | 2,049 | 0 | 0 | 2,049 |
| Suspicious | 29 | 0 | 1 | 30 |
| Positive | 25 | 0 | 5 | 30 |
| Total | 2,103 | 0 | 6 | 2,109 |

**Table S1 – Sample Distribution based on Year**

| **Year** | **Total Samples** | **ALL (%)** | **AML (%)** | **NHL (%)** |
| --- | --- | --- | --- | --- |
| 2017 | 466 (22%) | 397 (85.1%) | 22 (4.7%) | 47 (10%) |
| 2018 | 398 (18.8%) | 344 (86.4%) | 27 (6.7%) | 27 (6.7%) |
| 2019 | 450 (21.3%) | 373 (82.8%) | 39 (8.6%) | 38 (8.4%) |
| 2020 | 433 (20.5%) | 334 (77.1%) | 48 (11%) | 51 (11.7%) |
| 2021 | 362 (17.1%) | 279 (77%) | 39 (10.7%) | 44 (12.1%) |

ALL indicates Acute Lymphoblastic Leukemia; AML indicates Acute Myeloid Leukemia; NHL indicates Non-Hodgkin Lymphoma.

**Table S2 – Details of Samples with Positive Results**

| **Sample** | **Year** | **Group** | **Cytocentrifuge (cell/hpf)** | **Neubauer (cell/mm³)** | **Neutr%** | **Lym%** |
| --- | --- | --- | --- | --- | --- | --- |
| 1 | 1396 | ALL | Many | 1000 | 30% | 70% |
| 2 | 1396 | ALL | Some | 80 | 91% | 9% |
| 3 | 1396 | ALL | 12 | 7 | 28% | 71% |
| 4 | 1396 | ALL | 18 | 4 | 20% | 80% |
| 5 | 1396 | ALL | Some | 0 | 0 | 0 |
| 6 | 1396 | ALL | 29 | 0 | 0 | 0 |
| 7 | 1396 | ALL | 10 | 0 | 0 | 0 |
| 8 | 1396 | NHL | Some | 0 | 0 | 0 |
| 9 | 1397 | ALL | Many | 1700 | 4% | 96% |
| 10 | 1397 | ALL | Many | 20 | 10% | 80% |
| 11 | 1397 | ALL | 17 | 0 | 0 | 0 |
| 12 | 1397 | ALL | 17 | 0 | 0 | 0 |
| 13 | 1397 | ALL | 15 | 0 | 0 | 0 |
| 14 | 1397 | ALL | 14 | 0 | 0 | 0 |
| 15 | 1397 | ALL | 9 | 0 | 0 | 0 |
| 16 | 1398 | AML | Some | 0 | 0 | 0 |
| 17 | 1398 | ALL | 170 | 0 | 0 | 0 |
| 18 | 1398 | NHL | Some | 0 | 0 | 0 |
| 19 | 1398 | NHL | Some | 0 | 0 | 0 |
| 20 | 1398 | ALL | 24 | 0 | 0 | 0 |
| 21 | 1398 | ALL | 15 | 0 | 0 | 0 |
| 22 | 1398 | NHL | Some | 0 | 0 | 0 |
| 23 | 1398 | AML | Some | 0 | 0 | 0 |
| 24 | 1398 | ALL | 25 | 0 | 0 | 0 |
| 25 | 1399 | ALL | Many | 0 | 0 | 0 |
| 26 | 1399 | ALL | Some | 0 | 0 | 0 |
| 27 | 1399 | ALL | 34 | 0 | 0 | 0 |
| 28 | 1399 | ALL | 15 | 0 | 0 | 0 |
| 29 | 1399 | AML | 5 | 0 | 0 | 0 |
| 30 | 1400 | ALL | 100 | 0 | 0 | 0 |

ALL indicates Acute Lymphoblastic Leukemia; AML indicates Acute Myeloid Leukemia; NHL indicates Non-Hodgkin Lymphoma.
